# Supplementary material for: Culturable Microorganisms Associated with Sea Cucumbers and Microbial Natural Products
Source: MDPI journal article supplement (doi:10.3390/md19080461), 2021-08-16
Supplement: s1 [file s1]

**Table S1.** Microorganism genera associated with sea cucumbers.

| Microorganisms                    | Host Sea Cucumbers             | Geographical Location*                                     | References |
|-----------------------------------|--------------------------------|------------------------------------------------------------|------------|
| <b>Bacteria</b>                   |                                |                                                            |            |
| <i>Acidovorax</i> sp.             | <i>Apostichopus japonicus</i>  | PO: Funka Bay, Hokkaido, Japan                             | [24]       |
| <i>Acinetobacter schindleri</i>   | <i>Holothuria leucospilota</i> | PO: Sari Ringgung, Lampung, Indonesia                      | [25]       |
| <i>Acinetobacter</i> sp.          | <i>A. japonicus</i>            | PO: Ningde, Fujian, China                                  | [32]       |
| <i>Aeromonas</i> sp.              | <i>A. japonicus</i>            | PO: Alekseev Bay and Kiyevka Bay, Sea of Japan, Russia     | [33]       |
| <i>Agrobacterium</i> sp.          | <i>A. japonicus</i>            | PO: Ainuma fishing port, Hokkaido, Japan                   | [24]       |
| <i>Ahrensia kielensis</i>         | <i>A. japonicus</i>            | PO: Funka Bay, Hokkaido, Japan                             | [24]       |
| <i>Aliivibrio logei</i>           | <i>A. japonicus</i>            | PO: Ainuma fishing port, Hokkaido, Japan                   | [24]       |
| <i>Alteromonas</i> sp.            | <i>A. japonicus</i>            | PO: Funka Bay, Hokkaido, Japan                             | [24]       |
| <i>Bacillus altitudinis</i>       | <i>H. leucospilota</i>         | PO: Koe-cho, Nagasaki, Japan                               | [4]        |
| <i>Bacillus amyloliquefaciens</i> | <i>A. japonicus</i>            | PO: Kushima, Omura, Nagasaki, Japan                        | [17]       |
| <i>Bacillus aquaemaris</i>        | <i>H. leucospilota</i>         | PO: Dayang Bunting Island, Yan, Kedah Darul Aman, Malaysia | [31]       |
| <i>Bacillus aquimaris</i>         | <i>A. japonicus</i>            | PO: Kushima, Omura, Nagasaki, Japan                        | [17]       |
|                                   | <i>H. leucospilota</i>         | PO: Koe-cho, Nagasaki, Japan                               | [4]        |
| <i>Bacillus aryabhattai</i>       | <i>A. japonicus</i>            | PO: Kushima, Omura, Nagasaki, Japan                        | [17]       |
|                                   | <i>H. leucospilota</i>         | PO: Sari Ringgung, Lampung, Indonesia                      | [25]       |
| <i>Bacillus cereus</i>            | <i>A. japonicus</i>            | PO: Kushima, Omura, Nagasaki, Japan                        | [17]       |
|                                   | <i>A. japonicus</i>            | PO: Ainuma fishing port, Hokkaido, Japan                   | [24]       |
|                                   | <i>H. leucospilota</i>         | PO: Sari Ringgung, Lampung, Indonesia                      | [25]       |
| <i>Bacillus clarkii</i>           | <i>H. leucospilota</i>         | PO: Koe-cho, Nagasaki, Japan                               | [4]        |
| <i>Bacillus clausii</i>           | <i>A. japonicus</i>            | PO: Kushima, Omura, Nagasaki, Japan                        | [17]       |
|                                   | <i>H. leucospilota</i>         | PO: Koe-cho, Nagasaki, Japan                               | [4]        |
| <i>Bacillus farraginis</i>        | <i>A. japonicus</i>            | PO: Kushima, Omura, Nagasaki, Japan                        | [17]       |
| <i>Bacillus firmus</i>            | <i>A. japonicus</i>            | PO: Kushima, Omura, Nagasaki, Japan                        | [17]       |
| <i>Bacillus gibsonii</i>          | <i>A. japonicus</i>            | PO: Kushima, Omura, Nagasaki, Japan                        | [17]       |
|                                   | <i>H. leucospilota</i>         | PO: Koe-cho, Nagasaki, Japan                               | [4]        |
| <i>Bacillus horikoshii</i>        | <i>A. japonicus</i>            | PO: Kushima, Omura, Nagasaki, Japan                        | [17]       |
| <i>Bacillus horneckiae</i>        | <i>H. leucospilota</i>         | PO: Koe-cho, Nagasaki, Japan                               | [4]        |
| <i>Bacillus hunanensis</i>        | <i>A. japonicus</i>            | PO: Kushima, Omura, Nagasaki, Japan                        | [17]       |
|                                   | <i>H. leucospilota</i>         | PO: Koe-cho, Nagasaki, Japan                               | [4]        |

Table S1. *cont.*

| Microorganisms                   | Host Sea Cucumbers      | Geographical Location*                | References |
|----------------------------------|-------------------------|---------------------------------------|------------|
| <i>Bacillus hwaiaensis</i>       | <i>A. japonicus</i>     | PO: Xiaoshi Island, Weihai, China     | [6]        |
|                                  | <i>H. leucospilota</i>  | PO: Koe-cho, Nagasaki, Japan          | [4]        |
| <i>Bacillus idriensis</i>        | <i>H. leucospilota</i>  | PO: Sari Ringgung, Lampung, Indonesia | [25]       |
| <i>Bacillus lehensis</i>         | <i>H. leucospilota</i>  | PO: Koe-cho, Nagasaki, Japan          | [4]        |
| <i>Bacillus licheniformis</i>    | <i>A. japonicus</i>     | PO: Kushima, Omura, Nagasaki, Japan   | [17]       |
| <i>Bacillus marisflavi</i>       | <i>A. japonicus</i>     | PO: Kushima, Omura, Nagasaki, Japan   | [17]       |
|                                  | <i>H. leucospilota</i>  | PO: Koe-cho, Nagasaki, Japan          | [4]        |
| <i>Bacillus megaterium</i>       | <i>H. leucospilota</i>  | PO: Koe-cho, Nagasaki, Japan          | [4]        |
| <i>Bacillus methylotrophicus</i> | <i>A. japonicus</i>     | PO: Kushima, Omura, Nagasaki, Japan   | [17]       |
| <i>Bacillus murimartini</i>      | <i>H. leucospilota</i>  | PO: Koe-cho, Nagasaki, Japan          | [4]        |
| <i>Bacillus oshimensis</i>       | <i>A. japonicus</i>     | PO: Kushima, Omura, Nagasaki, Japan   | [17]       |
|                                  | <i>H. leucospilota</i>  | PO: Koe-cho, Nagasaki, Japan          | [4]        |
| <i>Bacillus patagoniensis</i>    | <i>H. leucospilota</i>  | PO: Koe-cho, Nagasaki, Japan          | [4]        |
| <i>Bacillus plakortidis</i>      | <i>H. leucospilota</i>  | PO: Koe-cho, Nagasaki, Japan          | [4]        |
| <i>Bacillus polygoni</i>         | <i>A. japonicus</i>     | PO: Kushima, Omura, Nagasaki, Japan   | [17]       |
|                                  | <i>H. leucospilota</i>  | PO: Koe-cho, Nagasaki, Japan          | [4]        |
| <i>Bacillus pseudofirmus</i>     | <i>A. japonicus</i>     | PO: Kushima, Omura, Nagasaki, Japan   | [17]       |
| <i>Bacillus pumilus</i>          | <i>A. japonicus</i>     | PO: Kushima, Omura, Nagasaki, Japan   | [17]       |
|                                  | <i>H. leucospilota</i>  | PO: Koe-cho, Nagasaki, Japan          | [4]        |
| <i>Bacillus safensis</i>         | <i>Stichopus vastus</i> | PO: Sari Ringgung, Lampung, Indonesia | [25]       |
|                                  | <i>H. leucospilota</i>  | PO: Sari Ringgung, Lampung, Indonesia | [25]       |
| <i>Bacillus stratosphericus</i>  | <i>H. leucospilota</i>  | PO: Koe-cho, Nagasaki, Japan          | [4]        |
| <i>Bacillus subtilis</i>         | <i>A. japonicus</i>     | PO: Kushima, Omura, Nagasaki, Japan   | [17]       |
| <i>Bacillus vietnamensis</i>     | <i>A. japonicus</i>     | PO: Kushima, Omura, Nagasaki, Japan   | [17]       |
|                                  | <i>H. leucospilota</i>  | PO: Koe-cho, Nagasaki, Japan          | [4]        |

Table S1. *cont.*

| Microorganisms                           | Host Sea Cucumbers          | Geographical Location*                                     | References |
|------------------------------------------|-----------------------------|------------------------------------------------------------|------------|
| <i>Bacillus</i> sp.                      | <i>A. japonicus</i>         | PO: Alekseev Bay and Kiyevka Bay, Sea of Japan, Russia     | [33]       |
|                                          | <i>A. japonicus</i>         | PO: Kushima, Omura, Nagasaki, Japan                        | [17]       |
|                                          | <i>A. japonicus</i>         | PO: Ningde, Fujian, China                                  | [32]       |
|                                          | <i>Holothuria atra</i>      | PO: Pangkor Island, Perak, Malaysia                        | [30]       |
|                                          | <i>H. leucospilota</i>      | PO: Dayang Bunting Island, Yan, Kedah Darul Aman, Malaysia | [31]       |
|                                          | <i>H. leucospilota</i>      | PO: Koe-cho, Nagasaki, Japan                               | [4]        |
|                                          | <i>H. leucospilota</i>      | PO: Sari Ringgung, Lampung, Indonesia                      | [25]       |
| <i>Brachybacterium paraconglomeratum</i> | <i>A. japonicus</i>         | PO: Xiaoshi Island, Weihai, China                          | [6]        |
| <i>Brevibacterium luteolum</i>           | <i>S. vastus</i>            | PO: Sari Ringgung, Lampung, Indonesia                      | [25]       |
| <i>Brevibacterium</i> sp.                | <i>A. japonicus</i>         | Not mentioned                                              | [23]       |
| <i>Cellulosimicrobium funkei</i>         | <i>A. japonicus</i>         | PO: Xiaoshi Island, Weihai, China                          | [6]        |
|                                          | <i>H. leucospilota</i>      | PO: Sari Ringgung, Lampung, Indonesia                      | [25]       |
| <i>Colwellia aestuarii</i>               | <i>A. japonicus</i>         | PO: Funka Bay, Hokkaido, Japan                             | [24]       |
| <i>Colwellia</i> sp.                     | <i>A. japonicus</i>         | PO: Ainuma fishing port, Hokkaido, Japan                   | [24]       |
| <i>Corynebacterium pilbarens</i>         | <i>H. leucospilota</i>      | PO: Sari Ringgung, Lampung, Indonesia                      | [25]       |
| <i>Cytophaga</i> sp.                     | <i>A. japonicus</i>         | PO: Funka Bay, Hokkaido, Japan                             | [24]       |
| <i>Dermacoccus nishinomiyaensis</i>      | <i>H. leucospilota</i>      | PO: Sari Ringgung, Lampung, Indonesia                      | [25]       |
| <i>Dermacoccus profundus</i>             | <i>H. leucospilota</i>      | PO: Sari Ringgung, Lampung, Indonesia                      | [25]       |
|                                          | <i>S. vastus</i>            | PO: Sari Ringgung, Lampung, Indonesia                      | [25]       |
| <i>Dietzia maris</i>                     | <i>S. vastus</i>            | PO: Sari Ringgung, Lampung, Indonesia                      | [25]       |
| <i>Enterobacter</i> sp.                  | <i>A. japonicus</i>         | PO: Alekseev Bay and Kiyevka Bay, Sea of Japan, Russia     | [33]       |
| <i>Epibacterium mobile</i>               | <i>H. leucospilota</i>      | PO: Sari Ringgung, Lampung, Indonesia                      | [25]       |
| <i>Erythrobacter vulgaris</i>            | <i>H. leucospilota</i>      | PO: Sari Ringgung, Lampung, Indonesia                      | [25]       |
|                                          | <i>S. vastus</i>            | PO: Sari Ringgung, Lampung, Indonesia                      | [25]       |
| <i>Exiguobacterium acetylicum</i>        | <i>Stichopus badionotus</i> | PO: Peninsular Malaysia, Malaysia                          | [26]       |
| <i>Exiguobacterium aestuarii</i>         | <i>H. leucospilota</i>      | PO: Dayang Bunting Island, Yan, Kedah Darul Aman, Malaysia | [31]       |
| <i>Exiguobacterium profundum</i>         | <i>S. badionotus</i>        | PO: Peninsular Malaysia, Malaysia                          | [26]       |
| <i>Ferrimonas senticii</i>               | <i>A. japonicus</i>         | PO: Kushima, Omura, Nagasaki, Japan                        | [17]       |
| <i>Flavobacterium</i> sp.                | <i>A. japonicus</i>         | PO: Kiyevka Bay, Sea of Japan, Russia                      | [33]       |

Table S1. *cont.*

| Microorganisms                        | Host Sea Cucumbers           | Geographical Location*                             | References |
|---------------------------------------|------------------------------|----------------------------------------------------|------------|
| <i>Geomicrobium halophilum</i>        | <i>A. japonicus</i>          | PO: Kushima, Omura, Nagasaki, Japan                | [17]       |
|                                       | <i>H. leucospilota</i>       | PO: Koe-cho, Nagasaki, Japan                       | [4]        |
| <i>Glutamicibacter protophormiae</i>  | <i>A. japonicus</i>          | PO: Xiaoshi Island, Weihai, China                  | [6]        |
| <i>Glutamicibacter</i> sp.            | <i>H. leucospilota</i>       | PO: Sari Ringgung, Lampung, Indonesia              | [25]       |
| <i>Gracilibacillus dipsosauri</i>     | <i>A. japonicus</i>          | PO: Kushima, Omura, Nagasaki, Japan                | [17]       |
|                                       | <i>H. leucospilota</i>       | PO: Koe-cho, Nagasaki, Japan                       | [4]        |
| <i>Gracilibacillus halotolerans</i>   | <i>A. japonicus</i>          | PO: Kushima, Omura, Nagasaki, Japan                | [17]       |
| <i>Gracilibacillus saliphilus</i>     | <i>A. japonicus</i>          | PO: Kushima, Omura, Nagasaki, Japan                | [17]       |
| <i>Gracilibacillus ureilyticus</i>    | <i>H. leucospilota</i>       | PO: Koe-cho, Nagasaki, Japan                       | [4]        |
| <i>Halobacillus kuroshimensis</i>     | <i>A. japonicus</i>          | PO: Kushima, Omura, Nagasaki, Japan                | [17]       |
|                                       | <i>A. japonicus</i>          | PO: Xiaoshi Island, Weihai, China                  | [6]        |
| <i>Halobacillus salinus</i>           | <i>H. leucospilota</i>       | PO: Koe-cho, Nagasaki, Japan                       | [4]        |
| <i>Halobacillus trueperi</i>          | <i>A. japonicus</i>          | PO: Kushima, Omura, Nagasaki, Japan                | [17]       |
|                                       | <i>H. leucospilota</i>       | PO: Koe-cho, Nagasaki, Japan                       | [4]        |
| <i>Halobacillus</i> sp.               | <i>A. japonicus</i>          | PO: Kushima, Omura, Nagasaki, Japan                | [17]       |
| <i>Halolactibacillus alkaliphilus</i> | <i>A. japonicus</i>          | PO: Kushima, Omura, Nagasaki, Japan                | [17]       |
| <i>Halomonas denitrificans</i>        | <i>H. leucospilota</i>       | PO: Koe-cho, Nagasaki, Japan                       | [4]        |
| <i>Halomonas</i> sp.                  | <i>A. japonicus</i>          | PO: Kiyevka Bay, Sea of Japan, Russia              | [33]       |
| <i>Iamia majanohamensis</i>           | <i>Holothuria edulis</i>     | PO: Coast of Aka Island, Okinawa prefecture, Japan | [18]       |
| <i>Isoptericola chiayiensis</i>       | <i>H. leucospilota</i>       | PO: Sari Ringgung, Lampung, Indonesia              | [25]       |
| <i>Janibacter alkaliphilus</i>        | <i>S. vastus</i>             | PO: Sari Ringgung, Lampung, Indonesia              | [25]       |
| <i>Janibacter anophelis</i>           | <i>H. leucospilota</i>       | PO: Sari Ringgung, Lampung, Indonesia              | [25]       |
| <i>Janibacter melonis</i>             | <i>H. leucospilota</i>       | PO: Sari Ringgung, Lampung, Indonesia              | [25]       |
| <i>Klebsiella</i> sp.                 | <i>H. atra</i>               | PO: Pangkor Island, Perak, Malaysia                | [30]       |
| <i>Kocuria flava</i>                  | <i>H. leucospilota</i>       | PO: Sari Ringgung, Lampung, Indonesia              | [25]       |
| <i>Kocuria palustris</i>              | <i>H. leucospilota</i>       | PO: Sari Ringgung, Lampung, Indonesia              | [25]       |
|                                       | <i>S. vastus</i>             | PO: Sari Ringgung, Lampung, Indonesia              | [25]       |
|                                       | <i>H. leucospilota</i>       | PO: Sari Ringgung, Lampung, Indonesia              | [25]       |
| <i>Kytococcus sedentarius</i>         | <i>Stichopus chloronotus</i> | PO: Tioman Island, Pahang Darul Makmur, Malaysia   | [31]       |
|                                       | <i>S. vastus</i>             | PO: Sari Ringgung, Lampung, Indonesia              | [25]       |

Table S1. *cont.*

| Microorganisms                          | Host Sea Cucumbers     | Geographical Location*                                 | References |
|-----------------------------------------|------------------------|--------------------------------------------------------|------------|
| <i>Lacinutrix copepodicola</i>          | <i>A. japonicus</i>    | PO: Funka Bay, Hokkaido, Japan                         | [24]       |
| <i>Lacinutrix</i> sp.                   | <i>A. japonicus</i>    | PO: Funka Bay and Ainuma fishing port, Hokkaido, Japan | [24]       |
| <i>Lysinibacillus fusiformis</i>        | <i>A. japonicus</i>    | PO: Kushima, Omura, Nagasaki, Japan                    | [17]       |
| <i>Maribacter aquivivus</i>             | <i>A. japonicus</i>    | PO: Funka Bay, Hokkaido, Japan                         | [24]       |
| <i>Marinobacterium</i> sp.              | <i>A. japonicus</i>    | PO: Ningde, Fujian, China                              | [32]       |
| <i>Marinomonas pontica</i>              | <i>A. japonicus</i>    | PO: Funka Bay, Hokkaido, Japan                         | [24]       |
| <i>Marinomonas</i> sp.                  | <i>A. japonicus</i>    | PO: Ningde, Fujian, China                              | [32]       |
| <i>Marinosulfonomonas methylotropha</i> | <i>A. japonicus</i>    | PO: Funka Bay, Hokkaido, Japan                         | [24]       |
| <i>Microbacterium paraoxydans</i>       | <i>A. japonicus</i>    | PO: Xiaoshi Island, Weihai, China                      | [6]        |
| <i>Microbacterium</i> sp.               | <i>A. japonicus</i>    | PO: Ningde, Fujian, China                              | [32]       |
| <i>Micrococcus aloeverae</i>            | <i>H. leucospilota</i> | PO: Sari Ringgung, Lampung, Indonesia                  | [25]       |
|                                         | <i>S. vastus</i>       | PO: Sari Ringgung, Lampung, Indonesia                  | [25]       |
| <i>Micrococcus aquilus</i>              | <i>S. chloronotus</i>  | PO: Tioman Island, Pahang Darul Makmur, Malaysia       | [31]       |
| <i>Micrococcus endophyticus</i>         | <i>H. leucospilota</i> | PO: Sari Ringgung, Lampung, Indonesia                  | [25]       |
| <i>Micrococcus flavus</i>               | <i>H. leucospilota</i> | PO: Sari Ringgung, Lampung, Indonesia                  | [25]       |
| <i>Micrococcus luteus</i>               | <i>H. leucospilota</i> | PO: Koe-cho, Nagasaki, Japan                           | [4]        |
|                                         | <i>S. chloronotus</i>  | PO: Tioman Island, Pahang Darul Makmur, Malaysia       | [31]       |
| <i>Micrococcus terreus</i>              | <i>S. vastus</i>       | PO: Sari Ringgung, Lampung, Indonesia                  | [25]       |
| <i>Micrococcus yunnanensis</i>          | <i>A. japonicus</i>    | PO: Xiaoshi Island, Weihai, China                      | [6]        |
| <i>Micrococcus</i> sp.                  | <i>A. japonicus</i>    | PO: Alekseev Bay and Kiyevka Bay, Sea of Japan, Russia | [33]       |
|                                         | <i>A. japonicus</i>    | PO: Funka Bay, Hokkaido, Japan                         | [24]       |
| <i>Nocardioides exalbidus</i>           | <i>H. leucospilota</i> | PO: Sari Ringgung, Lampung, Indonesia                  | [25]       |
| <i>Nocardiopsis lucentensis</i>         | <i>A. japonicus</i>    | PO: Kushima, Omura, Nagasaki, Japan                    | [17]       |
| <i>Nocardiopsis salina</i>              | <i>H. leucospilota</i> | PO: Koe-cho, Nagasaki, Japan                           | [4]        |
| <i>Nocardiopsis terrae</i>              | <i>A. japonicus</i>    | PO: Xiaoshi Island, Weihai, China                      | [6]        |
| <i>Oceanisphaera</i> sp.                | <i>A. japonicus</i>    | PO: Ningde, Fujian, China                              | [32]       |
| <i>Oceanobacillus chironomi</i>         | <i>A. japonicus</i>    | PO: Kushima, Omura, Nagasaki, Japan                    | [17]       |
| <i>Oceanobacillus iheyensis</i>         | <i>H. leucospilota</i> | PO: Koe-cho, Nagasaki, Japan                           | [4]        |
| <i>Oceanobacillus kimchii</i>           | <i>A. japonicus</i>    | PO: Kushima, Omura, Nagasaki, Japan                    | [17]       |
| <i>Oceanobacillus oncorhynchi</i>       | <i>A. japonicus</i>    | PO: Kushima, Omura, Nagasaki, Japan                    | [17]       |

Table S1. *cont.*

| Microorganisms                           | Host Sea Cucumbers     | Geographical Location*                                     | References |
|------------------------------------------|------------------------|------------------------------------------------------------|------------|
| <i>Oceanobacillus picturae</i>           | <i>A. japonicus</i>    | PO: Kushima, Omura, Nagasaki, Japan                        | [17]       |
| <i>Oceanobacillus profundus</i>          | <i>H. leucospilota</i> | PO: Koe-cho, Nagasaki, Japan                               | [4]        |
| <i>Oceanobacillus sojiae</i>             | <i>A. japonicus</i>    | PO: Kushima, Omura, Nagasaki, Japan                        | [17]       |
| <i>Octadecabacter</i> sp.                | <i>A. japonicus</i>    | PO: Funka Bay, Hokkaido, Japan                             | [24]       |
| <i>Ornithinimicrobium kibberense</i>     | <i>S. vastus</i>       | PO: Sari Ringgung, Lampung, Indonesia                      | [25]       |
| <i>Pantoea septica</i>                   | <i>S. vastus</i>       | PO: Sari Ringgung, Lampung, Indonesia                      | [25]       |
| <i>Paracoccus marinus</i>                | <i>H. leucospilota</i> | PO: Sari Ringgung, Lampung, Indonesia                      | [25]       |
| <i>Paracoccus koreensis</i>              | <i>H. leucospilota</i> | PO: Sari Ringgung, Lampung, Indonesia                      | [25]       |
| <i>Paracoccus sulfuroxidans</i>          | <i>H. leucospilota</i> | PO: Sari Ringgung, Lampung, Indonesia                      | [25]       |
| <i>Paraoerskovia marina</i>              | <i>H. leucospilota</i> | PO: Koe-cho, Nagasaki, Japan                               | [4]        |
| <i>Photobacterium rosenbergii</i>        | <i>H. leucospilota</i> | PO: Koe-cho, Nagasaki, Japan                               | [4]        |
| <i>Planococcus</i> sp.                   | <i>S. badionotus</i>   | PO: Peninsular Malaysia, Malaysia                          | [26]       |
| <i>Pseudidiomarina</i> sp.               | <i>A. japonicus</i>    | PO: Ningde, Fujian, China                                  | [32]       |
| <i>Pseudoalteromonas arctica</i>         | <i>A. japonicus</i>    | PO: Funka Bay and Ainuma fishing port, Hokkaido, Japan     | [24]       |
| <i>Pseudoalteromonas burtonensis</i>     | <i>A. japonicus</i>    | PO: Ainuma fishing port, Hokkaido, Japan                   | [24]       |
| <i>Pseudoalteromonas elyakovii</i>       | <i>A. japonicus</i>    | PO: Funka Bay and Ainuma fishing port, Hokkaido, Japan     | [24]       |
| <i>Pseudoalteromonas lipolytica</i>      | <i>A. japonicus</i>    | PO: Geomun-do, Yeosu, Korea                                | [34]       |
| <i>Pseudoalteromonas luteoviolacea</i>   | <i>S. badionotus</i>   | PO: Peninsular Malaysia, Malaysia                          | [26]       |
| <i>Pseudoalteromonas marina</i>          | <i>A. japonicus</i>    | PO: Funka Bay, Hokkaido, Japan                             | [24]       |
| <i>Pseudoalteromonas mariniglutinosa</i> | <i>H. leucospilota</i> | PO: Koe-cho, Nagasaki, Japan                               | [4]        |
| <i>Pseudoalteromonas prydzensis</i>      | <i>A. japonicus</i>    | PO: Ainuma fishing port, Hokkaido, Japan                   | [24]       |
|                                          | <i>H. leucospilota</i> | PO: Koe-cho, Nagasaki, Japan                               | [4]        |
|                                          | <i>A. japonicus</i>    | PO: Kushima, Omura, Nagasaki, Japan                        | [17]       |
| <i>Pseudoalteromonas tetraodonis</i>     | <i>A. japonicus</i>    | PO: Geomun-do, Yeosu, Korea                                | [34]       |
|                                          | <i>H. leucospilota</i> | PO: Koe-cho, Nagasaki, Japan                               | [4]        |
|                                          | <i>A. japonicus</i>    | PO: Funka Bay, Hokkaido, Japan                             | [24]       |
| <i>Pseudoalteromonas</i> sp.             | <i>A. japonicus</i>    | PO: Kiyevka Bay, Sea of Japan, Russia                      | [33]       |
|                                          | <i>A. japonicus</i>    | PO: Ningde, Fujian, China                                  | [32]       |
|                                          | <i>A. japonicus</i>    | PO: Ningde, Fujian, China                                  | [32]       |
| <i>Pseudomonas alcaligenes</i>           | <i>H. leucospilota</i> | PO: Dayang Bunting Island, Yan, Kedah Darul Aman, Malaysia | [31]       |
| <i>Pseudomonas cedrina</i>               | <i>A. japonicus</i>    | PO: Kushima, Omura, Nagasaki, Japan                        | [17]       |

Table S1. cont.

| Microorganisms                     | Host Sea Cucumbers     | Geographical Location*                                     | References |
|------------------------------------|------------------------|------------------------------------------------------------|------------|
| <i>Pseudomonas gessardii</i>       | <i>A. japonicus</i>    | PO: Kushima, Omura, Nagasaki, Japan                        | [17]       |
| <i>Pseudomonas mosselii</i>        | <i>H. leucospilota</i> | PO: Dayang Bunting Island, Yan, Kedah Darul Aman, Malaysia | [31]       |
| <i>Pseudomonas stutzeri</i>        | <i>A. japonicus</i>    | PO: Xiaoshi Island, Weihai, China                          | [6]        |
|                                    | <i>H. leucospilota</i> | PO: Dayang Bunting Island, Yan, Kedah Darul Aman, Malaysia | [31]       |
|                                    | <i>H. leucospilota</i> | PO: Sari Ringgung, Lampung, Indonesia                      | [25]       |
| <i>Pseudomonas</i> sp.             | <i>A. japonicus</i>    | PO: Ainuma fishing port, Hokkaido, Japan                   | [24]       |
|                                    | <i>A. japonicus</i>    | PO: Alekseev Bay and Kiyevka Bay, Sea of Japan, Russia     | [33]       |
|                                    | <i>A. japonicus</i>    | PO: Ningde, Fujian, China                                  | [32]       |
| <i>Pseudopropionibacterium</i> sp. | <i>S. vastus</i>       | PO: Sari Ringgung, Lampung, Indonesia                      | [25]       |
| <i>Pseudovibrio japonicus</i>      | <i>A. japonicus</i>    | PO: Kushima, Omura, Nagasaki, Japan                        | [17]       |
| <i>Psychrobacter celer</i>         | <i>H. leucospilota</i> | PO: Sari Ringgung, Lampung, Indonesia                      | [25]       |
| <i>Psychrobacter marincola</i>     | <i>H. leucospilota</i> | PO: Sari Ringgung, Lampung, Indonesia                      | [25]       |
| <i>Psychrobacter okhotskensis</i>  | <i>A. japonicus</i>    | PO: Ainuma fishing port, Hokkaido, Japan                   | [24]       |
| <i>Psychrobacter</i> sp.           | <i>A. japonicus</i>    | PO: Funka Bay, Hokkaido, Japan                             | [24]       |
|                                    | <i>S. badionotus</i>   | PO: Peninsular Malaysia, Malaysia                          | [26]       |
| <i>Psychromonas arctica</i>        | <i>A. japonicus</i>    | PO: Ainuma fishing port, Hokkaido, Japan                   | [24]       |
| <i>Psychroserpens burtonensis</i>  | <i>A. japonicus</i>    | PO: Funka Bay and Ainuma fishing port, Hokkaido, Japan     | [24]       |
| <i>Psychroserpens</i> sp.          | <i>A. japonicus</i>    | PO: Funka Bay, Hokkaido, Japan                             | [24]       |
| <i>Roseobacter</i> sp.             | <i>A. japonicus</i>    | PO: Ainuma fishing port, Hokkaido, Japan                   | [24]       |
| <i>Rothia amarae</i>               | <i>A. japonicus</i>    | PO: Funka Bay, Hokkaido, Japan                             | [24]       |
|                                    | <i>S. chloronotus</i>  | PO: Tioman Island, Pahang Darul Makmur, Malaysia           | [31]       |
| <i>Rothia kristinae</i>            | <i>H. leucospilota</i> | PO: Sari Ringgung, Lampung, Indonesia                      | [25]       |
| <i>Ruegeria lacuscaerulensis</i>   | <i>H. leucospilota</i> | PO: Koe-cho, Nagasaki, Japan                               | [4]        |
| <i>Salsuginibacillus kocurii</i>   | <i>A. japonicus</i>    | PO: Kushima, Omura, Nagasaki, Japan                        | [17]       |
| <i>Serinicoccus profundus</i>      | <i>S. vastus</i>       | PO: Sari Ringgung, Lampung, Indonesia                      | [25]       |
| <i>Shewanella baltica</i>          | <i>A. japonicus</i>    | PO: Ainuma fishing port, Hokkaido, Japan                   | [24]       |
| <i>Shewanella frigidimarina</i>    | <i>A. japonicus</i>    | PO: Funka Bay, Hokkaido, Japan                             | [24]       |
| <i>Shewanella gaetbuli</i>         | <i>H. leucospilota</i> | PO: Koe-cho, Nagasaki, Japan                               | [4]        |
| <i>Shewanella kaireitica</i>       | <i>A. japonicus</i>    | PO: Ainuma fishing port, Hokkaido, Japan                   | [24]       |
| <i>Shewanella marisflavi</i>       | <i>A. japonicus</i>    | PO: Xiaoshi Island, Weihai, China                          | [6]        |

Table S1. *cont.*

| Microorganisms                      | Host Sea Cucumbers     | Geographical Location*                                     | References |
|-------------------------------------|------------------------|------------------------------------------------------------|------------|
| <i>Shewanella pacifica</i>          | <i>A. japonicus</i>    | PO: Ainuma fishing port, Hokkaido, Japan                   | [24]       |
| <i>Shewanella</i> sp.               | <i>A. japonicus</i>    | PO: Ningde, Fujian, China                                  | [32]       |
| <i>Sphingomonas echinoides</i>      | <i>S. badionotus</i>   | PO: Peninsular Malaysia, Malaysia                          | [26]       |
| <i>Sphingomonas</i> sp.             | <i>A. japonicus</i>    | PO: Funka Bay, Hokkaido, Japan                             | [24]       |
| <i>Sporosarcina saromensis</i>      | <i>A. japonicus</i>    | PO: Kushima, Omura, Nagasaki, Japan                        | [17]       |
| <i>Sporosarcina</i> sp.             | <i>H. leucospilota</i> | PO: Koe-cho, Nagasaki, Japan                               | [4]        |
| <i>Staphylococcus arlettae</i>      | <i>S. vastus</i>       | PO: Sari Ringgung, Lampung, Indonesia                      | [25]       |
| <i>Staphylococcus cohnii</i>        | <i>H. leucospilota</i> | PO: Sari Ringgung, Lampung, Indonesia                      | [25]       |
|                                     | <i>S. vastus</i>       | PO: Sari Ringgung, Lampung, Indonesia                      | [25]       |
| <i>Staphylococcus edaphicus</i>     | <i>H. leucospilota</i> | PO: Sari Ringgung, Lampung, Indonesia                      | [25]       |
| <i>Staphylococcus haemolyticus</i>  | <i>H. leucospilota</i> | PO: Koe-cho, Nagasaki, Japan                               | [4]        |
|                                     | <i>S. vastus</i>       | PO: Sari Ringgung, Lampung, Indonesia                      | [25]       |
| <i>Staphylococcus pasteurii</i>     | <i>S. vastus</i>       | PO: Sari Ringgung, Lampung, Indonesia                      | [25]       |
| <i>Staphylococcus warneri</i>       | <i>H. leucospilota</i> | PO: Koe-cho, Nagasaki, Japan                               | [4]        |
|                                     | <i>H. leucospilota</i> | PO: Sari Ringgung, Lampung, Indonesia                      | [25]       |
| <i>Stenotrophomonas maltophilia</i> | <i>H. leucospilota</i> | PO: Dayang Bunting Island, Yan, Kedah Darul Aman, Malaysia | [31]       |
| <i>Streptomyces cavourensis</i>     | <i>S. vastus</i>       | PO: Sari Ringgung, Lampung, Indonesia                      | [25]       |
| <i>Streptomyces variabilis</i>      | <i>A. japonicus</i>    | PO: Xiaoshi Island, Weihai, China                          | [6]        |
| <i>Streptomyces</i> sp.             | <i>A. japonicus</i>    | PO: Kushima, Omura, Nagasaki, Japan                        | [17]       |
|                                     | <i>H. leucospilota</i> | IO: Larak Island, Persian Gulf, Iran                       | [19]       |
| <i>Ulvibacter</i> sp.               | <i>A. japonicus</i>    | PO: Ainuma fishing port, Hokkaido, Japan                   | [24]       |
| <i>Vibrio alginolyticus</i>         | <i>A. japonicus</i>    | PO: Xiaoshi Island, Weihai, China                          | [6]        |
|                                     | <i>H. leucospilota</i> | PO: Koe-cho, Nagasaki, Japan                               | [4]        |
|                                     | <i>H. leucospilota</i> | PO: Sari Ringgung, Lampung, Indonesia                      | [25]       |
| <i>Vibrio azureus</i>               | <i>H. leucospilota</i> | PO: Koe-cho, Nagasaki, Japan                               | [4]        |
| <i>Vibrio brasiliensis</i>          | <i>H. leucospilota</i> | PO: Koe-cho, Nagasaki, Japan                               | [4]        |
| <i>Vibrio communis</i>              | <i>H. leucospilota</i> | PO: Koe-cho, Nagasaki, Japan                               | [4]        |
| <i>Vibrio cyclitrophicus</i>        | <i>A. japonicus</i>    | PO: Funka Bay, Hokkaido, Japan                             | [24]       |
| <i>Vibrio ezurae</i>                | <i>H. leucospilota</i> | PO: Koe-cho, Nagasaki, Japan                               | [4]        |
| <i>Vibrio galicus</i>               | <i>A. japonicus</i>    | PO: Ainuma fishing port, Hokkaido, Japan                   | [24]       |



Table S1. *cont.*

| Microorganisms                         | Host Sea Cucumbers     | Geographical Location*                                     | References |
|----------------------------------------|------------------------|------------------------------------------------------------|------------|
| <i>Vibrio gigantis</i>                 | <i>H. leucospilota</i> | PO: Koe-cho, Nagasaki, Japan                               | [4]        |
| <i>Vibrio haliotocoli</i>              | <i>A. japonicus</i>    | PO: Ainuma fishing port, Hokkaido, Japan                   | [24]       |
| <i>Vibrio harveyi</i>                  | <i>H. leucospilota</i> | PO: Koe-cho, Nagasaki, Japan                               | [4]        |
|                                        | <i>H. leucospilota</i> | PO: Sari Ringgung, Lampung, Indonesia                      | [25]       |
|                                        | <i>S. badionotus</i>   | PO: Peninsular Malaysia, Malaysia                          | [26]       |
| <i>Vibrio mediterranei</i>             | <i>H. leucospilota</i> | PO: Koe-cho, Nagasaki, Japan                               | [4]        |
| <i>Vibrio natriegens</i>               | <i>H. leucospilota</i> | PO: Koe-cho, Nagasaki, Japan                               | [4]        |
| <i>Vibrio neptunius</i>                | <i>H. leucospilota</i> | PO: Koe-cho, Nagasaki, Japan                               | [4]        |
| <i>Vibrio owensii</i>                  | <i>H. leucospilota</i> | PO: Koe-cho, Nagasaki, Japan                               | [4]        |
|                                        | <i>H. leucospilota</i> | PO: Sari Ringgung, Lampung, Indonesia                      | [25]       |
| <i>Vibrio parahaemolyticus</i>         | <i>S. badionotus</i>   | PO: Peninsular Malaysia, Malaysia                          | [26]       |
|                                        | <i>H. leucospilota</i> | PO: Koe-cho, Nagasaki, Japan                               | [4]        |
| <i>Vibrio rotiferianus</i>             | <i>H. leucospilota</i> | PO: Koe-cho, Nagasaki, Japan                               | [4]        |
| <i>Vibrio splendidus</i>               | <i>A. japonicus</i>    | PO: Funka Bay and Ainuma fishing port, Hokkaido, Japan     | [24]       |
| <i>Vibrio tasmaniensis</i>             | <i>A. japonicus</i>    | PO: Ainuma fishing port, Hokkaido, Japan                   | [24]       |
|                                        | <i>H. leucospilota</i> | PO: Koe-cho, Nagasaki, Japan                               | [4]        |
| <i>Vibrio</i> sp.                      | <i>A. japonicus</i>    | PO: Alekseev Bay and Kiyevka Bay, Sea of Japan, Russia     | [33]       |
|                                        | <i>A. japonicus</i>    | PO: Ningde, Fujian, China                                  | [32]       |
|                                        | <i>H. leucospilota</i> | PO: Dayang Bunting Island, Yan, Kedah Darul Aman, Malaysia | [31]       |
|                                        | <i>H. leucospilota</i> | PO: Koe-cho, Nagasaki, Japan                               | [4]        |
|                                        | <i>H. leucospilota</i> | PO: Sari Ringgung, Lampung, Indonesia                      | [25]       |
|                                        | <i>S. badionotus</i>   | PO: Peninsular Malaysia, Malaysia                          | [26]       |
| <i>Virgibacillus chiguensis</i>        | <i>A. japonicus</i>    | PO: Kushima, Omura, Nagasaki, Japan                        | [17]       |
| <i>Virgibacillus dokdonensis</i>       | <i>A. japonicus</i>    | PO: Kushima, Omura, Nagasaki, Japan                        | [17]       |
|                                        | <i>H. leucospilota</i> | PO: Koe-cho, Nagasaki, Japan                               | [4]        |
| <i>Virgibacillus halodenitrificans</i> | <i>A. japonicus</i>    | PO: Kushima, Omura, Nagasaki, Japan                        | [17]       |
| <i>Virgibacillus marismortui</i>       | <i>A. japonicus</i>    | PO: Kushima, Omura, Nagasaki, Japan                        | [17]       |
| <i>Virgibacillus olivae</i>            | <i>A. japonicus</i>    | PO: Xiaoshi Island, Weihai, China                          | [6]        |
| <i>Virgibacillus</i> sp.               | <i>A. japonicus</i>    | PO: Kushima, Omura, Nagasaki, Japan                        | [17]       |
| <i>Williamsia muralis</i>              | <i>A. japonicus</i>    | PO: Funka Bay, Hokkaido, Japan                             | [24]       |

Table S1. *cont.*

| Microorganisms                      | Host Sea Cucumbers           | Geographical Location*                      | References |
|-------------------------------------|------------------------------|---------------------------------------------|------------|
| <i>Winogradskyella eximia</i>       | <i>A. japonicus</i>          | PO: Funka Bay, Hokkaido, Japan              | [24]       |
| <i>Winogradskyella thalassocola</i> | <i>A. japonicus</i>          | PO: Funka Bay, Hokkaido, Japan              | [24]       |
| <i>Zobellia amurskyensis</i>        | <i>A. japonicus</i>          | PO: Funka Bay, Hokkaido, Japan              | [24]       |
| <i>Zobellia russellii</i>           | <i>A. japonicus</i>          | PO: Funka Bay, Hokkaido, Japan              | [24]       |
| <b>Fungi</b>                        |                              |                                             |            |
| <i>Acremonium alternatum</i>        | <i>Holothuria poli</i>       | AO: Tabarka, Tunisia                        | [22]       |
| <i>Acremonium charticola</i>        | <i>Eupentacta fraudatrix</i> | PO: Sea of Japan, Primorye, Russia          | [20]       |
| <i>Acremonium fusidioides</i>       | <i>A. japonicus</i>          | PO: Sea of Japan, Primorye, Russia          | [20]       |
|                                     | <i>E. fraudatrix</i>         | PO: Sea of Japan, Primorye, Russia          | [20]       |
| <i>Acremonium implicatum</i>        | <i>H. poli</i>               | AO: Tabarka, Tunisia                        | [22]       |
| <i>Acremonium kiliense</i>          | <i>A. japonicus</i>          | PO: Sea of Japan, Primorye, Russia          | [20]       |
| <i>Acremonium striatisporum</i>     | <i>E. fraudatrix</i>         | PO: Kitovoe Rebro Bay, Sea of Japan, Russia | [21]       |
|                                     | <i>E. fraudatrix</i>         | PO: Sea of Japan, Primorye, Russia          | [20]       |
| <i>Acremonium trachycaulon</i>      | <i>A. japonicus</i>          | PO: Sea of Japan, Primorye, Russia          | [20]       |
| <i>Acrostalagmus luteoalbus</i>     | <i>H. poli</i>               | AO: Tabarka, Tunisia                        | [22]       |
| <i>Alternaria alternata</i>         | <i>A. japonicus</i>          | PO: Sea of Japan, Primorye, Russia          | [20]       |
|                                     | <i>E. fraudatrix</i>         | PO: Sea of Japan, Primorye, Russia          | [20]       |
|                                     | <i>H. poli</i>               | AO: Tabarka, Tunisia                        | [22]       |
| <i>Alternaria</i> sp.               | Unidentified                 | PO: Weihai, Yellow Sea, China               | [27]       |
|                                     | Unidentified                 | PO: Zhifu Island, Yantai, China             | [28]       |
| <i>Aspergillus awamori</i>          | <i>H. poli</i>               | AO: Tabarka, Tunisia                        | [22]       |
| <i>Aspergillus creber</i>           | <i>H. poli</i>               | AO: Tabarka, Tunisia                        | [22]       |
| <i>Aspergillus eburneocreus</i>     | <i>A. japonicus</i>          | PO: Sea of Japan, Primorye, Russia          | [20]       |
|                                     | <i>E. fraudatrix</i>         | PO: Sea of Japan, Primorye, Russia          | [20]       |
| <i>Aspergillus flavus</i>           | <i>A. japonicus</i>          | PO: Sea of Japan, Primorye, Russia          | [20]       |
| <i>Aspergillus foetidus</i>         | <i>H. poli</i>               | AO: Tabarka, Tunisia                        | [22]       |
| <i>Aspergillus fructus</i>          | <i>H. poli</i>               | AO: Tabarka, Tunisia                        | [22]       |
| <i>Aspergillus fumigatus</i>        | <i>Stichopus japonicus</i>   | PO: Lingshan Island, Qingdao, China         | [41]       |
| <i>Aspergillus insuetus</i>         | <i>H. poli</i>               | AO: Tabarka, Tunisia                        | [22]       |
| <i>Aspergillus micronesiensis</i>   | <i>H. poli</i>               | AO: Tabarka, Tunisia                        | [22]       |

Table S1. *cont.*

| Microorganisms                     | Host Sea Cucumbers        | Geographical Location*                 | References |
|------------------------------------|---------------------------|----------------------------------------|------------|
| <i>Aspergillus nidulans</i>        | <i>H. poli</i>            | AO: Tabarka, Tunisia                   | [22]       |
| <i>Aspergillus niger</i>           | <i>H. poli</i>            | AO: Tabarka, Tunisia                   | [22]       |
| <i>Aspergillus ochraceus</i>       | <i>H. poli</i>            | AO: Tabarka, Tunisia                   | [22]       |
| <i>Aspergillus polyporicola</i>    | <i>H. poli</i>            | AO: Tabarka, Tunisia                   | [22]       |
| <i>Aspergillus protuberus</i>      | <i>H. poli</i>            | AO: Tabarka, Tunisia                   | [22]       |
| <i>Aspergillus pseudodeflectus</i> | <i>H. poli</i>            | AO: Tabarka, Tunisia                   | [22]       |
| <i>Aspergillus spelaeus</i>        | <i>H. poli</i>            | AO: Tabarka, Tunisia                   | [22]       |
| <i>Aspergillus sydowii</i>         | <i>H. poli</i>            | AO: Tabarka, Tunisia                   | [22]       |
| <i>Aspergillus terreus</i>         | <i>A. japonicus</i>       | PO: Zhifu Island, Yantai, China        | [39]       |
| <i>Aspergillus tubingensis</i>     | <i>H. poli</i>            | AO: Tabarka, Tunisia                   | [22]       |
| <i>Aspergillus versicolor</i>      | <i>A. japonicus</i>       | PO: Sea of Japan, Primorye, Russia     | [20]       |
|                                    | <i>E. fraudatrix</i>      | PO: Sea of Japan, Primorye, Russia     | [20]       |
|                                    | <i>H. poli</i>            | AO: Tabarka, Tunisia                   | [22]       |
| <i>Aspergillus</i> sp.             | <i>Cucumaria japonica</i> | PO: South China Sea, China             | [36]       |
|                                    | <i>Holothuria nobilis</i> | SO: the Antarctic                      | [35]       |
|                                    | <i>H. poli</i>            | AO: Tabarka, Tunisia                   | [22]       |
|                                    | <i>S. japonicus</i>       | PO: Lingshan Island, Qingdao, China    | [42]       |
| <i>Aureobasidium pullulans</i>     | <i>H. poli</i>            | AO: Tabarka, Tunisia                   | [22]       |
| <i>Auxarthron ostraviense</i>      | <i>H. poli</i>            | AO: Tabarka, Tunisia                   | [22]       |
| <i>Beauveria alba</i>              | <i>E. fraudatrix</i>      | PO: Sea of Japan, Primorye, Russia     | [20]       |
| <i>Botryophialophora</i> sp.       | <i>E. fraudatrix</i>      | PO: Sea of Japan, Primorye, Russia     | [20]       |
| <i>Cadophora luteo-olivacea</i>    | <i>H. poli</i>            | AO: Tabarka, Tunisia                   | [22]       |
| <i>Chaetomium globosum</i>         | <i>A. japonicus</i>       | PO: Chengshantou Island, Weihai, China | [29]       |
|                                    | <i>H. poli</i>            | AO: Tabarka, Tunisia                   | [22]       |
| <i>Chaetomium olivaceum</i>        | <i>A. japonicus</i>       | PO: Sea of Japan, Primorye, Russia     | [20]       |
| <i>Chaetomium subaffine</i>        | <i>H. poli</i>            | AO: Tabarka, Tunisia                   | [22]       |
| <i>Chaetomium</i> sp.              | <i>H. poli</i>            | AO: Tabarka, Tunisia                   | [22]       |
| <i>Cladosporium atospermum</i>     | <i>A. japonicus</i>       | PO: Sea of Japan, Primorye, Russia     | [20]       |
|                                    | <i>C. japonica</i>        | PO: Sea of Japan, Primorye, Russia     | [20]       |
|                                    | <i>E. fraudatrix</i>      | PO: Sea of Japan, Primorye, Russia     | [20]       |

Table S1. *cont.*

| Microorganisms                        | Host Sea Cucumbers   | Geographical Location*             | References |
|---------------------------------------|----------------------|------------------------------------|------------|
| <i>Cladosporium brevicompactum</i>    | <i>A. japonicus</i>  | PO: Sea of Japan, Primorye, Russia | [20]       |
|                                       | <i>C. japonica</i>   | PO: Sea of Japan, Primorye, Russia | [20]       |
|                                       | <i>E. fraudatrix</i> | PO: Sea of Japan, Primorye, Russia | [20]       |
| <i>Cladosporium oxysporum</i>         | <i>A. japonicus</i>  | PO: Sea of Japan, Primorye, Russia | [20]       |
|                                       | <i>E. fraudatrix</i> | PO: Sea of Japan, Primorye, Russia | [20]       |
| <i>Cladosporium sphaerospermum</i>    | <i>A. japonicus</i>  | PO: Sea of Japan, Primorye, Russia | [20]       |
|                                       | <i>C. japonica</i>   | PO: Sea of Japan, Primorye, Russia | [20]       |
|                                       | <i>E. fraudatrix</i> | PO: Sea of Japan, Primorye, Russia | [20]       |
|                                       | <i>H. poli</i>       | AO: Tabarka, Tunisia               | [22]       |
| <i>Dendrodochium</i> sp.              | <i>H. nobilis</i>    | PO: South China Sea, China         | [37]       |
| <i>Dendryphiella arenaria</i>         | <i>A. japonicus</i>  | PO: Sea of Japan, Primorye, Russia | [20]       |
| <i>Emericella quadrilineata</i>       | <i>H. poli</i>       | AO: Tabarka, Tunisia               | [22]       |
| <i>Epicoccum</i> st. <i>Phoma</i> sp. | <i>A. japonicus</i>  | PO: Sea of Japan, Primorye, Russia | [20]       |
|                                       | <i>E. fraudatrix</i> | PO: Sea of Japan, Primorye, Russia | [20]       |
| <i>Epicoccum</i> sp.                  | <i>A. japonicus</i>  | PO: Yantai, China                  | [40]       |
|                                       | Unidentified         | PO: Weihai, Yellow Sea, China      | [43]       |
| <i>Fusarium</i> sp.                   | Unidentified         | PO: Yantai, China                  | [45]       |
| <i>Myriodontium keratinophilum</i>    | <i>H. poli</i>       | AO: Tabarka, Tunisia               | [22]       |
| <i>Myrothecium verrucaria</i>         | <i>H. poli</i>       | AO: Tabarka, Tunisia               | [22]       |
| <i>Oidiodendron truncatum</i>         | <i>A. japonicus</i>  | PO: Sea of Japan, Primorye, Russia | [20]       |
| <i>Oidiodendron</i> sp.               | <i>E. fraudatrix</i> | PO: Sea of Japan, Primorye, Russia | [20]       |
| <i>Paecilomyces lilacinus</i>         | <i>H. poli</i>       | AO: Tabarka, Tunisia               | [22]       |
| <i>Penicillium adametzii</i>          | <i>H. poli</i>       | AO: Tabarka, Tunisia               | [22]       |
| <i>Penicillium antarcticum</i>        | <i>H. poli</i>       | AO: Tabarka, Tunisia               | [22]       |
| <i>Penicillium brevicompactum</i>     | <i>H. poli</i>       | AO: Tabarka, Tunisia               | [22]       |
| <i>Penicillium chrysogenum</i>        | <i>H. poli</i>       | AO: Tabarka, Tunisia               | [22]       |
| <i>Penicillium citreonigrum</i>       | <i>H. poli</i>       | AO: Tabarka, Tunisia               | [22]       |
| <i>Penicillium citrinum</i>           | <i>H. poli</i>       | AO: Tabarka, Tunisia               | [22]       |

Table S1. *cont.*

| Microorganisms                    | Host Sea Cucumbers   | Geographical Location*                 | References |
|-----------------------------------|----------------------|----------------------------------------|------------|
| <i>Penicillium commune</i>        | <i>A. japonicus</i>  | PO: Sea of Japan, Primorye, Russia     | [20]       |
|                                   | <i>E. fraudatrix</i> | PO: Sea of Japan, Primorye, Russia     | [20]       |
|                                   | <i>H. poli</i>       | AO: Tabarka, Tunisia                   | [22]       |
| <i>Penicillium corylophilum</i>   | <i>H. poli</i>       | AO: Tabarka, Tunisia                   | [22]       |
| <i>Penicillium herquei</i>        | <i>A. japonicus</i>  | PO: Sea of Japan, Primorye, Russia     | [20]       |
|                                   | <i>E. fraudatrix</i> | PO: Sea of Japan, Primorye, Russia     | [20]       |
| <i>Penicillium implicatum</i>     | <i>E. fraudatrix</i> | PO: Sea of Japan, Primorye, Russia     | [20]       |
| <i>Penicillium oxalicum</i>       | <i>H. poli</i>       | AO: Tabarka, Tunisia                   | [22]       |
| <i>Penicillium roqueforti</i>     | <i>E. fraudatrix</i> | PO: Sea of Japan, Primorye, Russia     | [20]       |
| <i>Penicillium roseopurpureum</i> | <i>H. poli</i>       | AO: Tabarka, Tunisia                   | [22]       |
| <i>Penicillium skrjabinii</i>     | <i>E. fraudatrix</i> | PO: Sea of Japan, Primorye, Russia     | [20]       |
| <i>Penicillium steckii</i>        | <i>H. poli</i>       | AO: Tabarka, Tunisia                   | [22]       |
| <i>Phialemonium</i> sp.           | <i>H. nobilis</i>    | PO: South China Sea, China             | [38]       |
| <i>Phialophorophoma</i> sp.       | <i>E. fraudatrix</i> | PO: Sea of Japan, Primorye, Russia     | [20]       |
| <i>Stachybotrys chartarum</i>     | <i>H. poli</i>       | AO: Tabarka, Tunisia                   | [22]       |
| <i>Stilbella aciculosa</i>        | <i>A. japonicus</i>  | PO: Sea of Japan, Primorye, Russia     | [20]       |
| <i>Tilachlidium</i> sp.           | <i>E. fraudatrix</i> | PO: Sea of Japan, Primorye, Russia     | [20]       |
| <i>Trichoderma aureoviride</i>    | <i>A. japonicus</i>  | PO: Sea of Japan, Primorye, Russia     | [20]       |
| <i>Trichoderma epimyces</i>       | <i>H. poli</i>       | AO: Tabarka, Tunisia                   | [22]       |
| <i>Trichoderma harzianum</i>      | <i>A. japonicus</i>  | PO: Sea of Japan, Primorye, Russia     | [20]       |
|                                   | <i>H. poli</i>       | AO: Tabarka, Tunisia                   | [22]       |
| <i>Trichoderma viride</i>         | <i>A. japonicus</i>  | PO: Sea of Japan, Primorye, Russia     | [20]       |
| <i>Trichoderma</i> sp.            | Unidentified         | PO: Chengshantou Island, Weihai, China | [44]       |
| <i>Ulocladium</i> sp.             | <i>A. japonicus</i>  | PO: Sea of Japan, Primorye, Russia     | [20]       |
|                                   | <i>E. fraudatrix</i> | PO: Sea of Japan, Primorye, Russia     | [20]       |
| <i>Verticillium tenerum</i>       | <i>E. fraudatrix</i> | PO: Sea of Japan, Primorye, Russia     | [20]       |

\*Symbols of world principal oceanic areas: AO, Atlantic Ocean; ArO, Arctic Ocean; IO, Indian Ocean; PO, Pacific Ocean; SO, Southern Ocean (Antarctic Ocean).
